# Supplementary material for: Modelling daily weight variation in honey bee hives
Source: PubMed Central journal article supplement (PMC9977058; doi:10.1371/journal.pcbi.1010880), 2023-03-01
Supplement: pcbi.1010880.s001.pdf [file pcbi.1010880.s001.pdf]

## Supporting Information

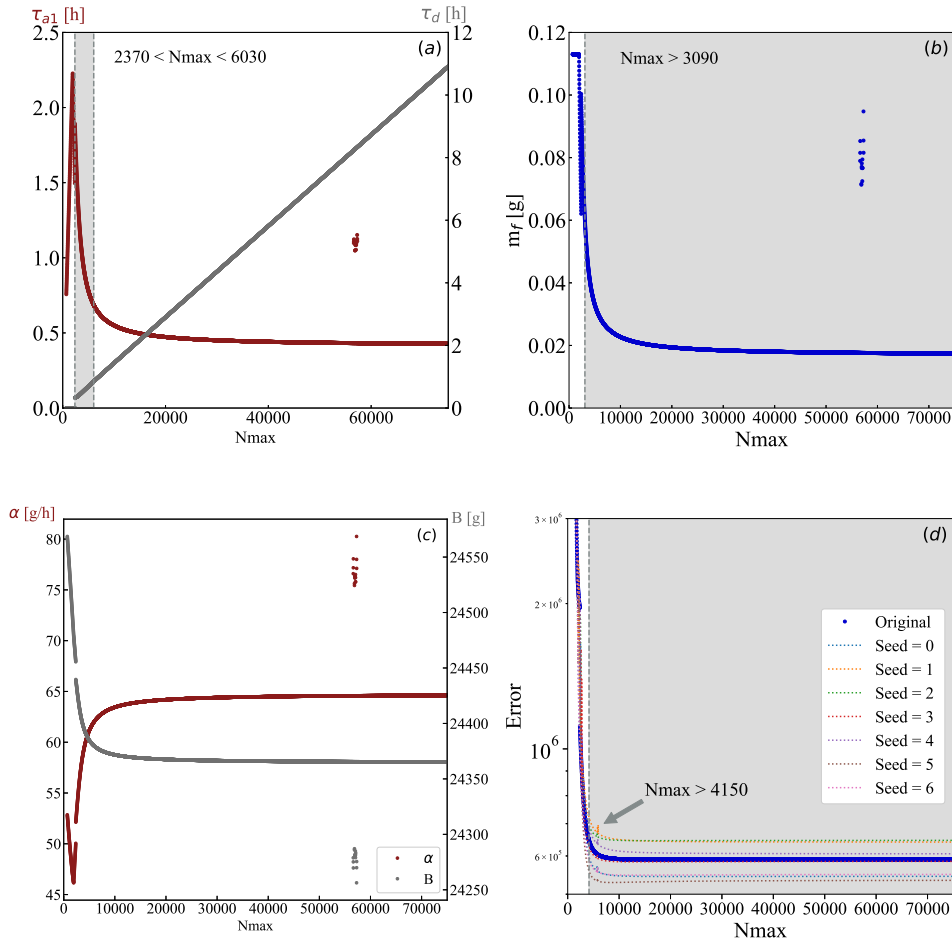

**S 1 Fig.** Multiple solutions are obtained from the Hive 6 on 2018-4-7, and then reduced to a confidence interval. (a) The time spent inside,  $\tau_d$ , and outside the hive during the day,  $\tau_{a1}$  is compared with reported intervals of time inside the hive taking by the forager bees between trips, and an average of time outside the hive per flying. Then, a valid interval is selected considering previous reports. (b) The maximum reported food load collected per trip (crop load) is 0.077 g. The shaded area represents a region where an acceptable crop load is obtained. (c) Representation of two characteristic parameters, the rate of gained weight and the intersection with  $t = 0$ , as  $N_{max}$  decreases  $B$  and  $\alpha$  become unstable. (d) Error calculated as the sum of the squared difference between the model and the real data. The shaded area represents a region where an acceptable error occurs based on bootstrapping simulation.
