# Supplementary material for: Modelling daily weight variation in honey bee hives
Source: PubMed Central journal article supplement (PMC9977058; doi:10.1371/journal.pcbi.1010880), 2023-03-01
Supplement: pcbi.1010880.s002.pdf [file pcbi.1010880.s002.pdf]

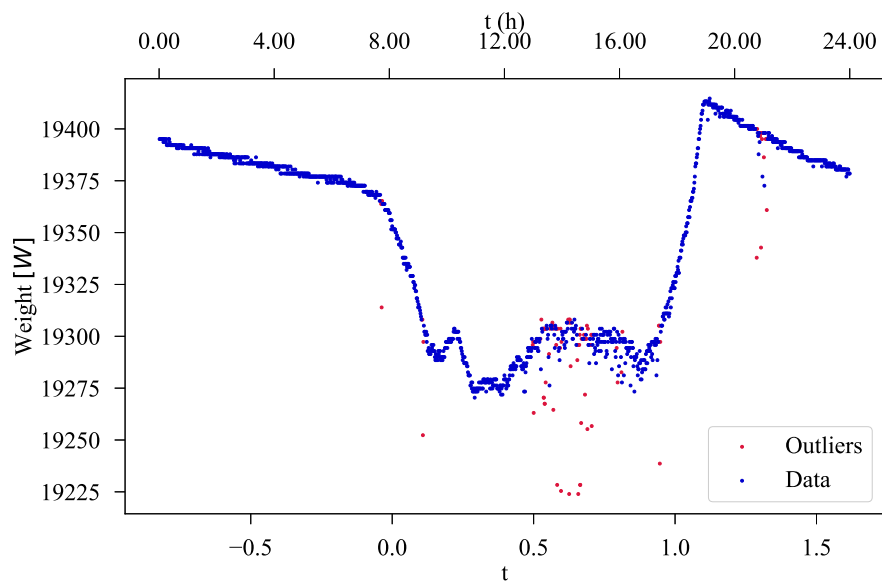

*S 2 Fig. Example of outlier detection for the Hive 10 on 2018-4-7. The outliers detected are in red color and were removed before the data analysis.*
